# Supplementary material for: Smartphone based highly sensitive visualized detection of acid phosphatase enzyme activity
Source: Royal Society of Chemistry journal article supplement (doi:10.1039/d0ay02128h), 2020-12-30
Supplement: d0ay02128h1.pdf [file d0ay02128h1.pdf]

## Supporting Information

### Smartphone Based Highly Sensitive Visualized Detection of Acid Phosphatase Enzyme Activity

Rui Li, Yanan Sun, Lihua Jin\*, Xiaohong Qiao, Cong Li and Yehua Shen

Key Laboratory of Synthetic and Natural Functional Molecule Chemistry of the Ministry of Education, College of Chemistry & Materials Science, Northwest University, Xi'an 710069, People's Republic of China

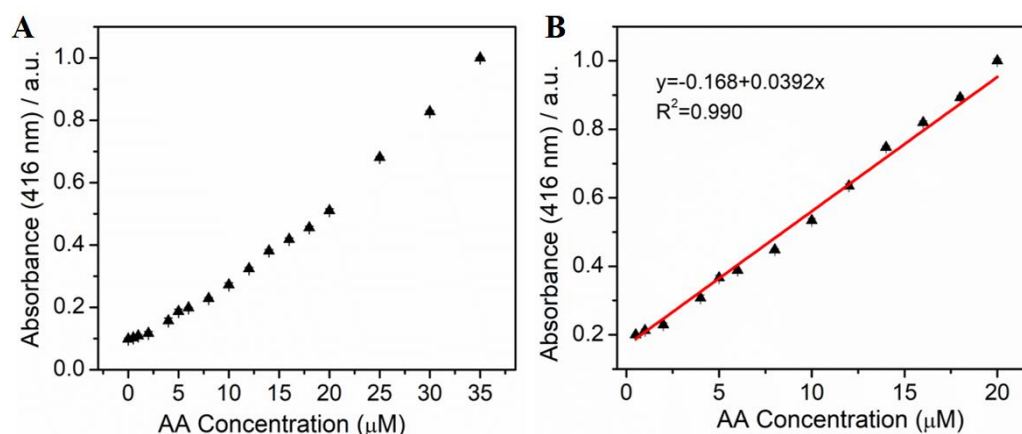

**Fig. S1** (A) The absorbance values at 416 nm of the system in the presence of different concentrations of AA. (B) The linear regression to plots of the absorbance at  $\lambda = 416$  nm with the concentration of AA. The error bars represent the standard deviation of three measurements.

**Table S1** Comparative table for the detection of ascorbic acid.

| Methods      | Materials              | Linear range    | LOD          | Ref.      |
|--------------|------------------------|-----------------|--------------|-----------|
| Fluorescence | BSA-Au NCs             | 0.75-20 $\mu$ M | 0.2 $\mu$ M  | [1]       |
| Fluorescence | AgInS <sub>2</sub> QDs | 0.66-99 $\mu$ M | 26 nM        | [2]       |
| Fluorescence | N-CDs-MnO <sub>2</sub> | 30-220 $\mu$ M  | 0.36 $\mu$ M | [3]       |
| Colorimetric | Cu NPs@C               | 10-1000 $\mu$ M | 1.41 $\mu$ M | [4]       |
| Colorimetric | Cu-Ag/rGO              | 0.005-0.03 mM   | 3.6 $\mu$ M  | [5]       |
| Colorimetric | FeCo NPs@PNC           | 0.5-28 $\mu$ M  | 0.38 $\mu$ M | [6]       |
| Colorimetric | Au@Ag NPs              | 0.5-20 $\mu$ M  | 0.08 $\mu$ M | This work |

\* To whom correspondence should be addressed. Fax: +86-029-88302635. E-mail: [jinlihua@nwu.edu.cn](mailto:jinlihua@nwu.edu.cn).

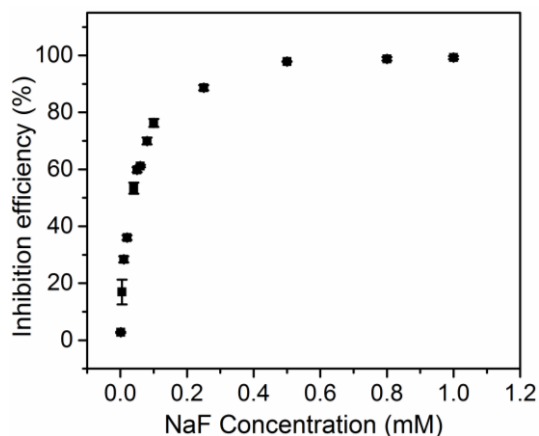

**Fig. S2** The inhibition efficiency of NaF towards ACP. The error bars represent the standard deviation of three measurements.

## References

- [1]. W. Cui, Y. Wang, D. Yang and J. Du, *Microchim. Acta*, 2017, **184**, 4749-4755.
- [2]. B. M. M. May, S. Parani and O. S. Oluwafemi, *Mater. Lett.*, 2019, **236**, 432-435.
- [3]. Z. Zhu, X. Lin, L. Wu, C. Zhao, Y. Zheng, A. Liu, L. Lin and X. Lin, *Sens. Actuators B: Chem.*, 2018, **274**, 609-615.
- [4]. H. Tan, C. Ma, L. Gao, Q. Li, Y. Song, F. Xu, T. Wang and L. Wang, *Chemistry*, 2014, **20**, 16377-16383.
- [5]. G. Darabdhara, B. Sharma, M. R. Das, R. Boukherroub and S. Szunerits, *Sens. Actuators B: Chem.*, 2017, **238**, 842-851.
- [6]. T. Wu, Z. Ma, P. Li, M. Liu, X. Liu, H. Li, Y. Zhang and S. Yao, *Talanta*, 2019, **202**, 354-361.
